# Supplementary material for: Inhibition of CRISPR-Cas9 ribonucleoprotein complex assembly by anti-CRISPR AcrIIC2
Source: PubMed Central journal article supplement (PMC6594998; doi:10.1038/s41467-019-10577-3), 2019-06-26
Supplement: 41467_2019_10577_MOESM2_ESM.pdf [file 41467_2019_10577_MOESM2_ESM.pdf]

Supplementary Information

**Inactivation of the CRISPR-Cas9 ribonucleoprotein complex by AcrIIC2**

Thavalingam et al.

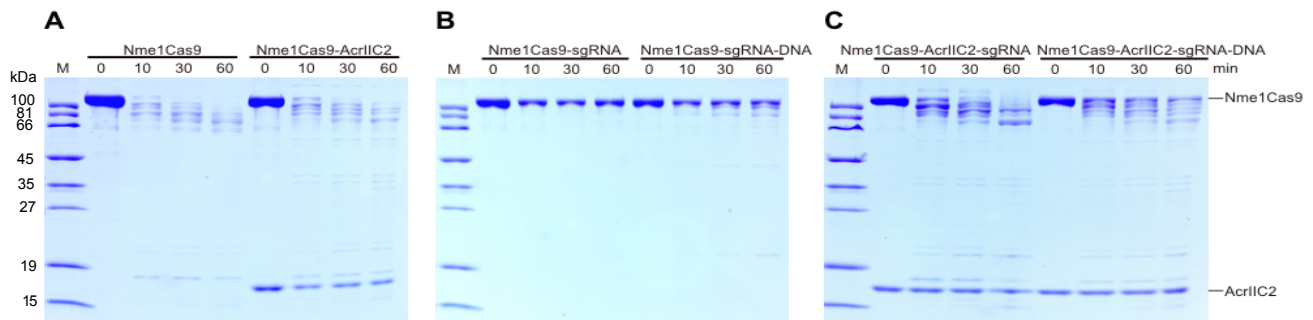

**Supplementary Figure 1: Limited  $\alpha$ -chymotrypsin proteolysis.**

(A) Limited proteolysis of Nme1Cas9 with and without AcrIIC2<sub>Nme</sub>. (B) Nme1Cas9-sgRNA with and without DNA. (C) Nme1Cas9-AcrIIC2<sub>Nme</sub>-sgRNA with and without DNA.

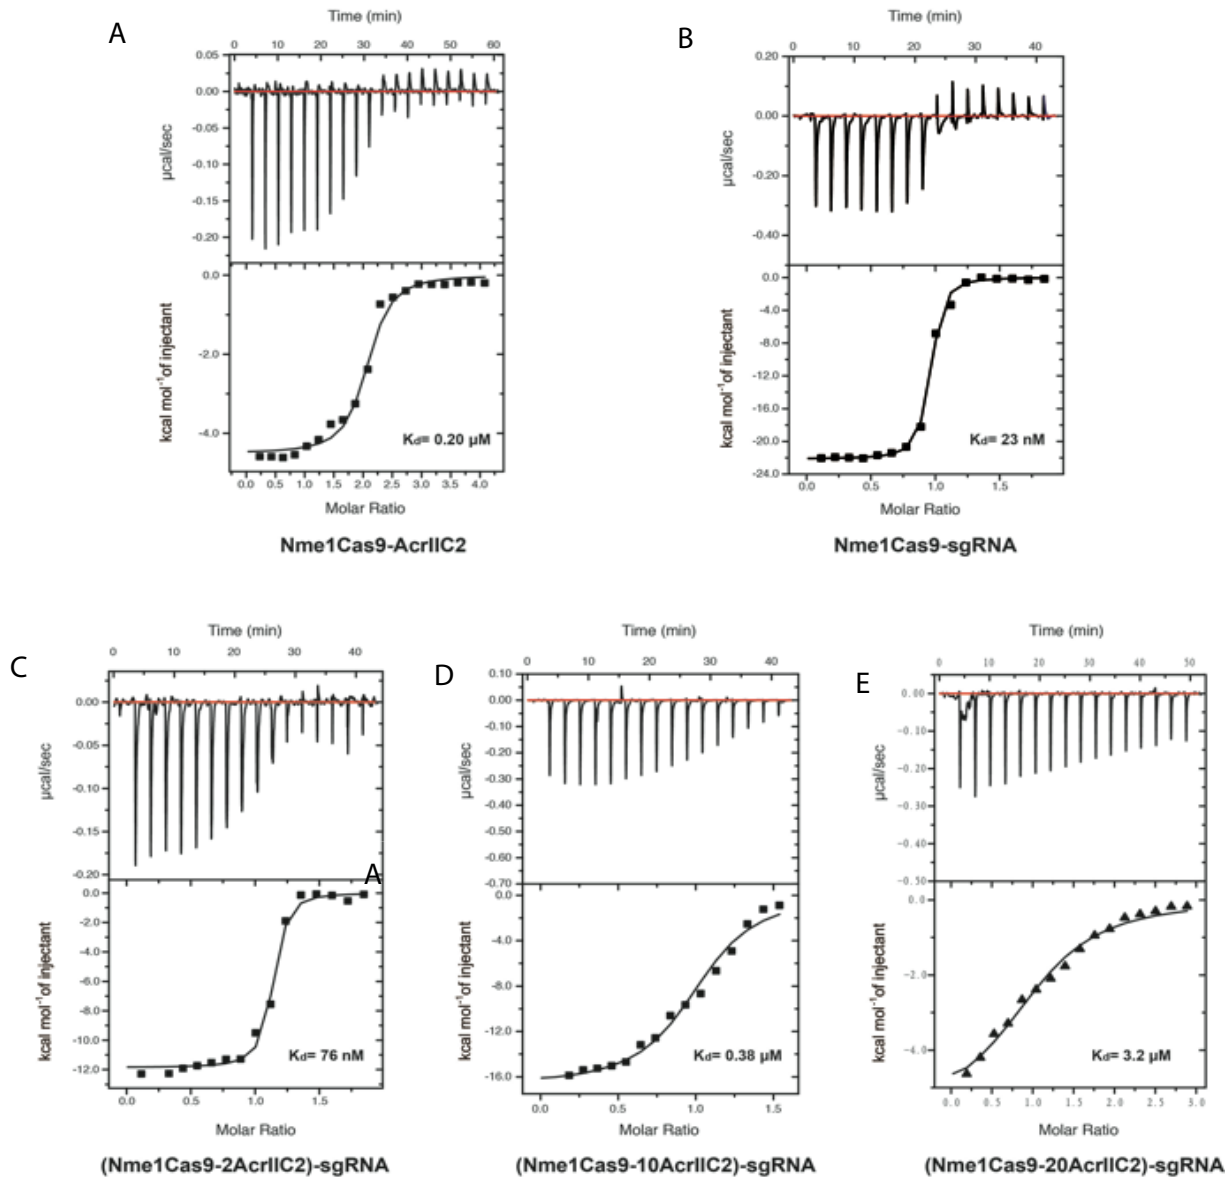

**Supplementary Figure 2: Characterization of the competition of AcrIIc2<sub>Nme</sub> over sgRNA binding to Nme1Cas9 by isothermal titration calorimetry (ITC).**

ITC measurement for the binding affinities of Nme1Cas9 toward AcrIIc2<sub>Nme</sub> (A) and sgRNA (B). ITC measurements for the binding affinities of (Nme1Cas9-AcrIIc2<sub>Nme</sub>) for sgRNA. The molar ratios of Nme1Cas9 over AcrIIc2<sub>Nme</sub> were set to 1:2 (C), 1:10 (D) and 1:20 (E). All ITC measurements were repeated three times with one representative experiment shown.

A

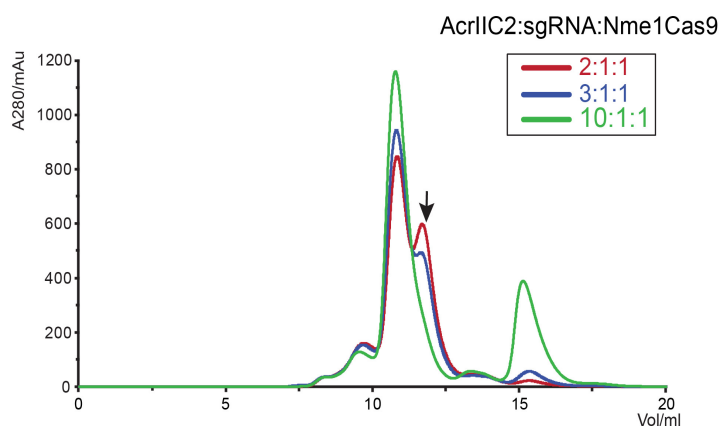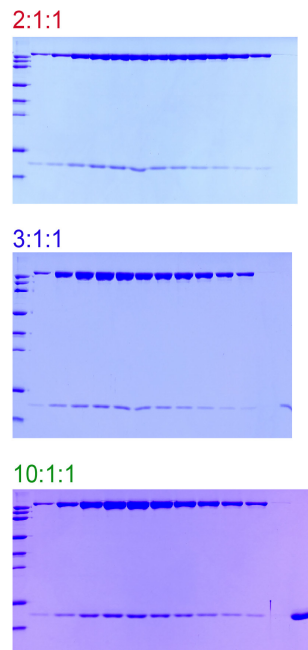

B

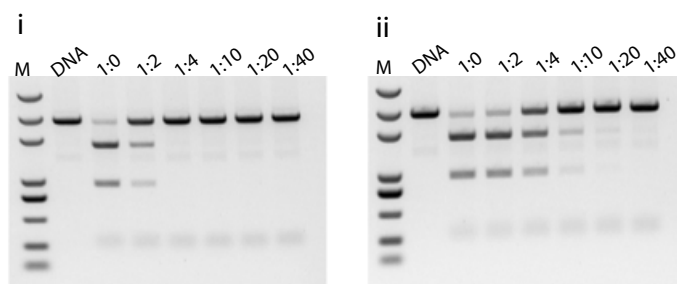

**Supplementary Figure 3: Nme1Cas9-sgRNA complex formation is blocked by higher AcrIIc2<sub>Nme</sub> concentrations.**

(A) AcrIIc2<sub>Nme</sub>, sgRNA and Nme1Cas9 were mixed together with the molar ratio of 2:1:1, 3:1:1 or 10:1:1. The small peak indicated by the black arrow is the Nme1Cas9-sgRNA complex. No Nme1Cas9-sgRNA complex is observed when a 10-fold excess of AcrIIc2<sub>Nme</sub> is present. (B) Competitive cleavage assays with various molar ratios of anti-CRISPR reveals that AcrIIc2<sub>Nme</sub> and sgRNA compete for the binding site of Nme1Cas9. Linear plasmid DNA was used as the substrate. The molar ratio of the Nme1Cas9 and AcrIIc2<sub>Nme</sub> are shown above the gel. The molar ratio of Nme1Cas9 and sgRNA is 1:1.1. (i) AcrIIc2<sub>Nme</sub> was mixed with Nme1Cas9 and incubated for 15 min to form the AcrIIc2<sub>Nme</sub>-NmeCas9 complex before addition of sgRNA. (ii) The AcrIIc2<sub>Nme</sub>, sgRNA and Nme1Cas9 were added simultaneously. Nme1Cas9 and sgRNA were added at a ratio of 1:1.1 with a molar ratio of 2 to 40-fold excess of AcrIIc2<sub>Nme</sub>, as noted above the gel.



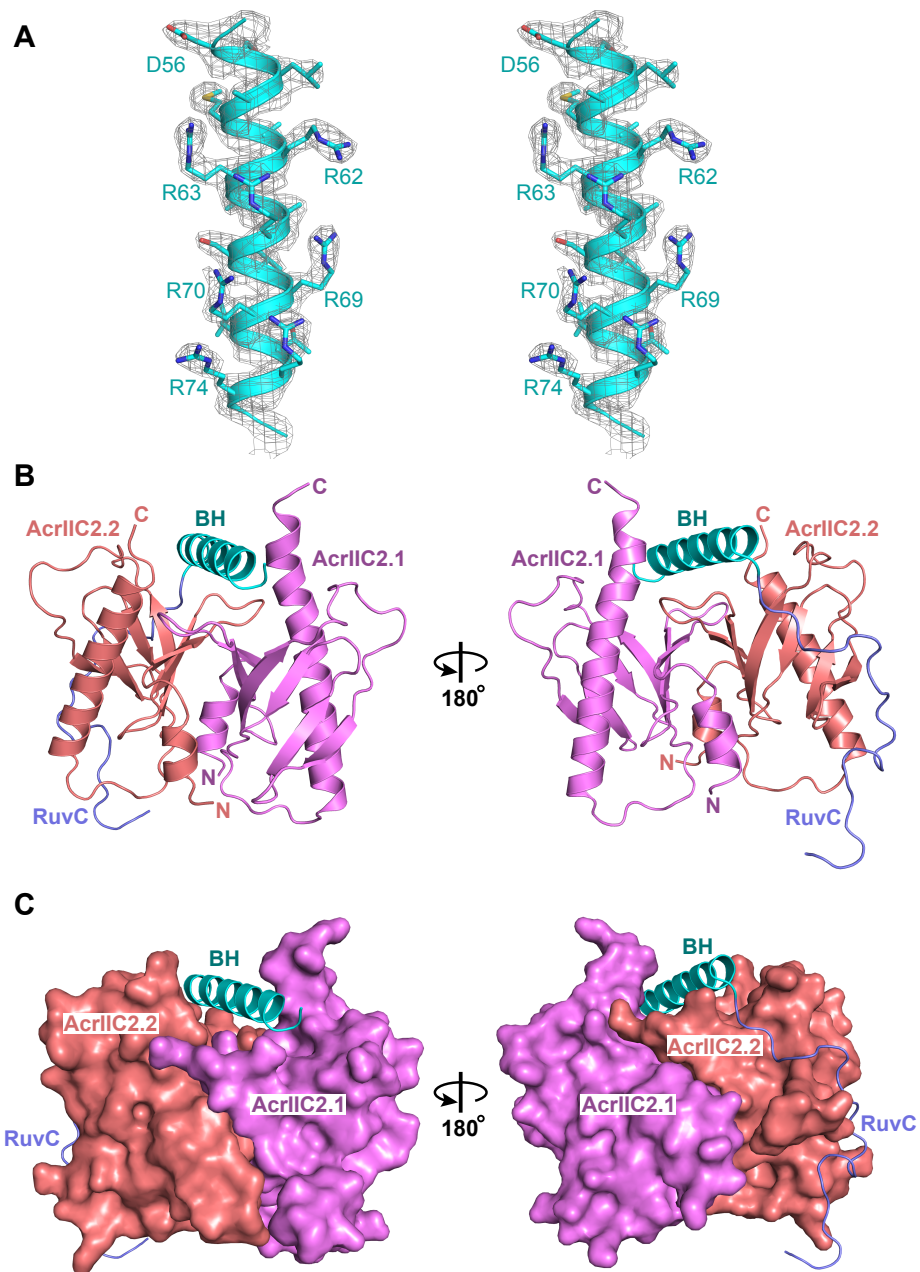

**Supplementary Figure 4: Structure of AcrIIIC2<sub>Nme</sub>-Nme1Cas9 complex treated by  $\alpha$ -chymotrypsin before crystallization.**

(A) Stereo image of the electron density of PBD 6JDJ. Cartoon representation (B) and surface representation (C) of AcrIIIC2<sub>Nme</sub>-Nme1Cas9 complex.

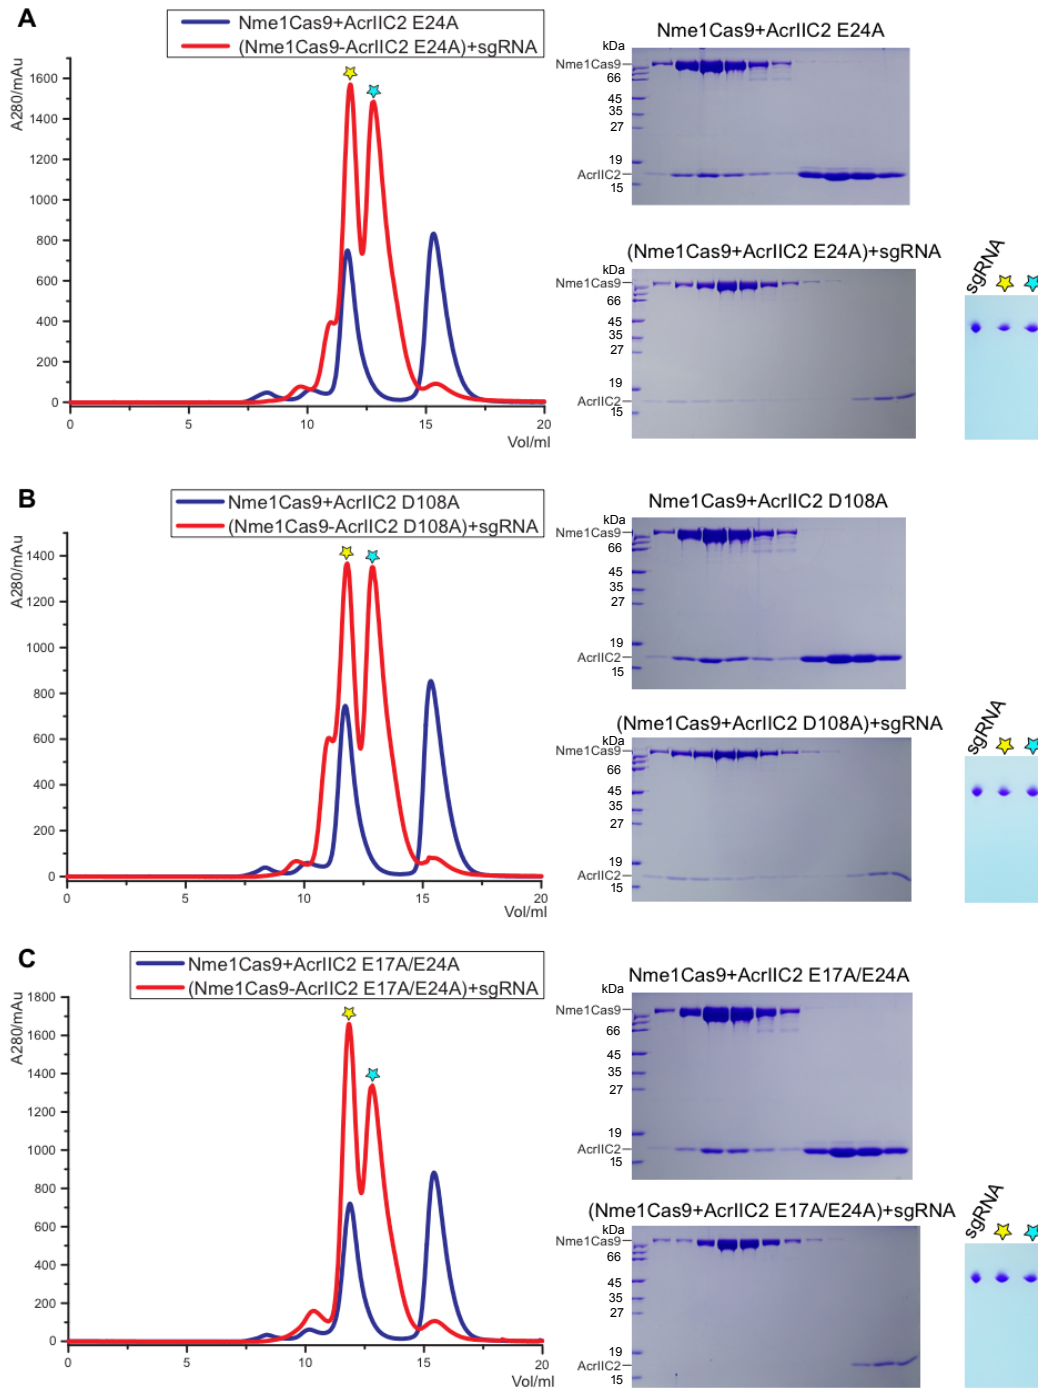

**Supplementary Figure 5: Gel filtration experiments to assess the ability of AcrIIc2<sub>Nme</sub> mutants to interact with Nme1Cas9.**

First, Nme1Cas9 incubated with AcrIIc2<sub>Nme</sub> mutant protein was purified by gel filtration (blue line) to get the preformed Nme1Cas9-AcrIIc2<sub>Nme</sub> complex. Fractions of the left peak (blue) contain the Nme1Cas9-AcrIIc2<sub>Nme</sub> complex. To test whether the sgRNA replaces the AcrIIc2<sub>Nme</sub> mutant bound to Nme1Cas9, sgRNA was added to the preformed Nme1Cas9-AcrIIc2<sub>Nme</sub> the complex followed by gel filtration (red line). Fractions indicated with yellow or cyan stars were analyzed on SDS-PAGE gel (left panel) and Urea-PAGE gel (right panel). The component of the peak indicated with the yellow star is Nme1Cas9-sgRNA complex, and that with the cyan star is the free sgRNA. (A) AcrIIc2<sub>Nme</sub> E24A mutant, (B) AcrIIc2<sub>Nme</sub> D108A mutant and (C) AcrIIc2<sub>Nme</sub> E17A/E24A mutant.

**Supplementary Table 1. Primers used for construct generation**

| Primer             | Sequence (5'-3')                                                                                               |
|--------------------|----------------------------------------------------------------------------------------------------------------|
| NmeCas9_Sumo_F     | CGCGGATCCATGGCTGCGTTTAAACCGAAC                                                                                 |
| NmeCas9_Sumo_R     | CCGCTCGAGTTAACGAACCGGCGGGCGTT                                                                                  |
| AcrIIIC2_Sumo_F    | CGCGGATCCATGTCTAAAAACAACATCTTC                                                                                 |
| AcrIIIC2_Sumo_R    | CCGCTCGAGCTAATCATCCCAACCTTCCAG                                                                                 |
| sgRNA_F            | TCACTCTGCTATTTAACTTTAC                                                                                         |
| sgRNA_R            | CCCAAGCTTCGCAAATCGTTT                                                                                          |
| Cje_F1             | TTAAAAAATGACTCGAGTAAGGATCTCCAG                                                                                 |
| Cje_R1             | GGATAAAAATGCTATGGCATAGCAAAGTG                                                                                  |
| Cje_F2             | ATGCCATAGCATTTTTATCCATAAGATTAGCGG                                                                              |
| Cje_R2             | CTCTGAAAACGAAAAACCGCCTTGCGAG                                                                                   |
| Cje_F3             | CGGTTTTTTCGTTTTCAGAGCAAGAGATTACG                                                                               |
| Cje_R3             | TTCTTGCCATAGATCCTTTCTCCTCTTTAGATC                                                                              |
| Cje_F4             | GAAAGGATCTATGGCAAGAATTTTGGCATTG                                                                                |
| Cje_R4             | CTTACTCGAGTCATTTTTTAAAATCTTCTCTTTGTCTAAAC                                                                      |
| Cje Mu targeting_F | TCCATGTTGCTAAAAAGCAAGGATGGG                                                                                    |
| Cje Mu targeting_R | ACAACCCATCCTTGCTTTTTAGCAACA                                                                                    |
| Nme1_F1            | CTCGAGTAAGGATCTCCAGGCATC                                                                                       |
| Nme1_R1            | GAGACCTGCCGTGGTCTCATG<br>CTGTTTCTCCATGAGACCACGGCAGGTCTCGTTGTAGCTCCCTTTCTCA<br>TTTCG                            |
| Nme1_F2            | TTTGATGCCTGGCAGTAAACGATGCCCTTAAAGCAG                                                                           |
| Nme1_R2            | AAGGGGCATCGTTTACTGCCAGGCATCAAATAAAACG                                                                          |
| Nme1_F3            | TTTGAAGGCAGCCATAGATCCTTTCTCCTCTTTAGATCTTTTGAATTC                                                               |
| Nme1_R3            | GAGGAGAAAGGATCTATGGCTGCCTTCAAACCTAATTC                                                                         |
| Nme1_F4            | GTAATGATCTCCGTAGATTTCCGGCGCAGGCTTCATC                                                                          |
| Nme1_R4            | GCCTGCGCCGAAATCTACGGAGATCATTACGGCAAGAAGAATACGG                                                                 |
| Nme1_F5            | TGACAGTCTCCATATGCCCTTGCCCGCTCATCTTCC                                                                           |
| Nme1_R5            | TGAGCGGGCAAGGGCATATGGGAGACTGTCAAATCCGCCAAAC                                                                    |
| Nme1_F6            | TTATTTGATGCCTGGAGATCCTTACTCGAGTTAACGGACAGGGCGGGCG                                                              |
| Nme1_R6            | TTTTTTC                                                                                                        |
| Nme Mu targeting_F | TCCACATCTGGTTCAGCTCTTCAATCAG                                                                                   |
| Nme Mu targeting_R | ACAACCTGATTGAAGAGCTGGAACCAGATG                                                                                 |
| Hpa_F1             | ATTGGAAGTGGATAACTCGAGTAAGGATCTCCAG<br>CCAAGGTTCGAGTCCAAGGATATAATGTAAGTTTTTATTTTCCATAGATC<br>CTTTCTCCTCTTTAGATC |
| Hpa_R1             | GATCTAAAGAGGAGAAAGGATCTATGGAAAATAAAAACTTACATTAT<br>ATCCCTTGGACTIONGACCTTGG                                     |
| Hpa_F2             | AGATCCTTACTCGAGTTATCCACTTCCAATGTTACG                                                                           |
| Hpa_R2             | GTTTTTCAGAGCAAGAGATTACGCGCAGACCAAAAACG                                                                         |
| Hpa_F3             | GCTATGGCATAGCAAAGTGTGACG                                                                                       |
| Hpa_R3             |                                                                                                                |
| Hpa Mu targeting_F | TCCACTGGTTTGCCGAAAACATCGGCTGG                                                                                  |
| Hpa Mu targeting_R | ACAACCAGCCGATGTTTTCGGCAAACCAG                                                                                  |
| pMCSG7 Gib F       | AACATTGGAAGTGGATAACGGATC                                                                                       |
| pMCSG7 Gib R       | GGCATTGGATTGGAAGTACAGGTTCC                                                                                     |
| HpaCas9 HNH Gib F  | GAACCTGTACTIONTCCAATCCAATGCCCGTGACTIONTAGAAAAACGTC<br>GGATCCGTTATCCACTTCCAATGTTTTATAAATTACGTTCAATAAAGCC<br>C   |
| HpaCas9 HNH Gib R  | C                                                                                                              |

|                                |                                                    |
|--------------------------------|----------------------------------------------------|
| HpaCas9 PID Gib F              | GAACCTGTACTTCCAATCCAATGCCAATCATGAATTTGTCCAACCTCTG  |
| HpaCas9 PID Gib R              | TCGGATCCGTTATCCACTTCCAATG                          |
| HpaCas9 RECD $\Delta$ BH Gib F | GAACCTGTACTTCCAATCCAATGCCGCTCGTCTGAAAAAAGC         |
| HpaCas9 RECD $\Delta$ BH Gib R | GGATCCGTTATCCACTTCCAATGTTTTAATGGTTTTCTTCTGTTTTTTTA |
| HpaCas9 REC Gib F              | C                                                  |
| pMCSG7 mid Gib1 F              | GAACCTGTACTTCCAATCCAATGCCGCGCTTTTCTCGCC            |
| pMCSG7 mid Gib2 R              | CTGATTCTGTGGATAACCGTATTACCGCC                      |
| HpaCas9 $\Delta$ HNH Gib1 R    | CGGTAATACGGTTATCCACAGAATCAGG                       |
| HpaCas9 $\Delta$ HNH Gib2 F    | GCGTATCATTACGATCTTTGTAAGATTTGCCAAC                 |
| HpaCas9 $\Delta$ PID Gib F     | ATCTTACAAAGATCGTAATGATACGCGCTACGTTGCTC             |
| HpaCas9 $\Delta$ PID Gib R     | GAACCTGTACTTCCAATCCAATGCCATGGAAAATAAAAAAC          |
| HpaCas9 $\Delta$ REC Gib1 R    | GTTATCCACTTCCAATGTTTTAGGCTTGTGGACGATCCG            |
| HpaCas9 $\Delta$ REC Gib2 F    | TGTGGTAAAGAAGTGAAACGCGACGTTGAGTTAATCGACG           |
| AcrIIC2_E17A_F                 | ACTCAACGTCGCGTTCCTTACCACAGATTCCAGCTG               |
| AcrIIC2_E17A_R                 | ACCCGACCATCATCCACGGTGCGGCGCGTGGTGGAAAACGAT         |
| AcrIIC2_E17D_F                 | ATCGTTTTTACCACGCGCCGCACCGTGGATGATGGTTCGGGT         |
| AcrIIC2_E17D_R                 | ACCCGACCATCATCCACGGTGACGCGCGTGGTGGAAAACGATGA       |
| AcrIIC2_E24A_F                 | TCATCGTTTTTACCACGCGCGTCACCGTGGATGATGGTTCGGGT       |
| AcrIIC2_E24A_R                 | GCGCGTGGTGGAAAACGATGCGTTTCGTTGTTACACCCCGTTA        |
| AcrIIC2_E24D_F                 | TAACGGGTGTGAACAACGAACGCATCGTTTTTACCACGCGC          |
| AcrIIC2_E24D_R                 | AAGCGCGTGGTGGAAAACGATGACTTCGTTGTTACACCCCGTTA       |
| AcrIIC2_D108A_F                | TAACGGGTGTGAACAACGAAGTCATCGTTTTTACCACGCGCTT        |
| AcrIIC2_D108A_R                | GTGATCGTATCGCGCGGATGCGCTGATGCTGAACGAAGATGC         |
| AcrIIC2_D108E_F                | GCATCTTCGTTTCAGCATCAGCGCATCCGCCGCGATACGATCAC       |
| AcrIIC2_D108E_R                | GTGATCGTATCGCGCGGATGAACTGATGCTGAACGAAGATGC         |
| AcrIIC2_N112A_F                | GCATCTTCGTTTCAGCATCAGTTTCATCCGCCGCGATACGATCAC      |
| AcrIIC2_N112A_R                | CGGCCGATGATCTGATGCTGGCGGAAGATGCGGCTGATCTGGA        |
| Nme1Cas9_R62A_F                | TCCAGATCAGCCGCATCTTCCGCCAGCATCAGATCATCCGCCG        |
| Nme1Cas9_R62A_R                | GTGATAGCCTGGCTATGGCAGCGCGCTTAGCGCGCTCTGTA          |
| Nme1Cas9_R62K_F                | TACAGAGCGCGCTAAGCGCGCTGCCATAGCCAGGCTATCAC          |
| Nme1Cas9_R62K_R                | GTGATAGCCTGGCTATGGCAAACGCTTAGCGCGCTCTGTACG         |
| Nme1Cas9_R66A_F                | CGTACAGAGCGCGCTAAGCGTTTTGCCATAGCCAGGCTATCAC        |
| Nme1Cas9_R66A_R                | CTATGGCACGTCGCTTAGCGGCGTCTGTACGTCGTCTGACTCG        |
| Nme1Cas9-R69A-F                | CGAGTCAGACGACGTACAGACGCCGCTAAGCGACGTGCCATAG        |
| Nme1Cas9-R69A-R                | CGCTTAGCGCGCTCTGTAGCGCGTCTGACTCGTCGTCGCGC          |
| Nme1Cas9_R70A_F                | GCGCGACGACGAGTCAGACGCGCTACAGAGCGCGCTAAGCG          |
| Nme1Cas9_R70A_R                | GCTTAGCGCGCTCTGTACGTGCGCTGACTCGTCGTCGCGCGCA        |
| Nme1Cas9_R69A_R70A_F           | TGCGCGCGACGACGAGTCAGCGCACGTACAGAGCGCGCTAAGC        |
| Nme1Cas9_R69A_R70A_R           | GTCGCTTAGCGCGCTCTGTAGCGGCGCTGACTCGTCGTCGCGCGCA     |
| Nme1Cas9_R73A_F                | TGCGCGCGACGACGAGTCAGCGCCGCTACAGAGCGCGCTAAGCGAC     |
| Nme1Cas9_R73A_R                | GCTCTGTACGTCGTCTGACTGCGCGTCGCGCGCACCGTCTGCT        |
| Nme1Cas9_R74A_F                | AGCAGACGGTGC GCGGACGCGCAGTCAGACGACGTACAGAGC        |
| Nme1Cas9_R74A_R                | CTGTACGTCGTCTGACTCGTGC GCGCGCGCACCGTCTGCTGCG       |
| Nme1Cas9_R74K_F                | CGCAGCAGACGGTGC GCGCGCGCACGAGTCAGACGACGTACAG       |
| Nme1Cas9_R74K_R                | CTGTACGTCGTCTGACTCGTAAACGCGCGCACCGTCTGCTGCG        |
| Cje_sgRNA                      | CGCAGCAGACGGTGC GCGCGGTTTTACGAGTCAGACGACGTACAG     |
| Nme_sgRNA                      | GUUUUAGUCCCUGAAAAGGGACUAAAAUAAAGAGUUUGCGGGACUC     |
|                                | UGC GGGGUUACAAUCCCCUAAAACCGCUUUUUU                 |
|                                | GUUGUAGCUCUUUCUCAUUUCGGAAACGAAAUGAGAACCGU          |
|                                | UGC UACAAUAAGGCCGUCUGAAAAGAUGUGCCGCAACGCUCUGCCCC   |

---

UAAAAGCUUCUGCUUUAAAGGGGCAUCGUUUA

Hpa\_sgRNA

GUUGUAGCUCCCUUUUUCAUUUCGCAGAAAUGCGAAAUGAAAAACG  
UUGUUACAAUAAGAGAAAAGAUUUCUCGCAAAGCUCUGUCCCUUGA  
AAUGUAAGUUUCAAGGGACAUCUUUU

---
